# Supplementary material for: Chemical engineering of a birefringent crystal transparent in the deep UV range
Source: Royal Society of Chemistry journal article supplement (doi:10.1039/c2ce25240f), 2012-01-01
Supplement: c2ce25240f.pdf [file c2ce25240f.pdf]

## Supporting Information

### Chemical Engineering of a Birefringent Crystal Transparent in the Deep UV Range

R. K. Li<sup>a,\*</sup> and Yingying Ma<sup>a,b</sup>

<sup>a</sup> Beijing Center for Crystal Research and Development, Technical Institute of Physics  
and Chemistry, Chinese Academy of Sciences, Beijing 100190, P. R. China. <sup>b</sup>

Graduate University of Chinese Academy of Sciences, Beijing 100049, P. R. China

Email: [rkli@mail.ipc.ac.cn](mailto:rkli@mail.ipc.ac.cn)

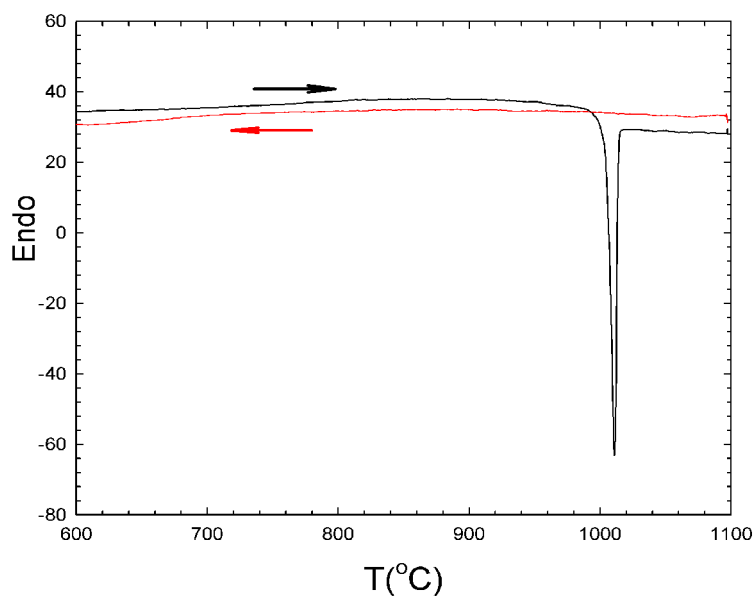

The DSC curve of  $\text{Ba}_2\text{Mg}(\text{B}_3\text{O}_6)_2$ .
